# Supplementary material for: Electromyographic Response of the Abdominal Muscles and Stabilizers of the Trunk to Reflex Locomotion Therapy (RLT). A Preliminary Study
Source: MDPI journal article supplement (doi:10.3390/jcm11133866), 2022-07-03
Supplement: s1 [file s1]

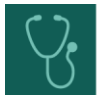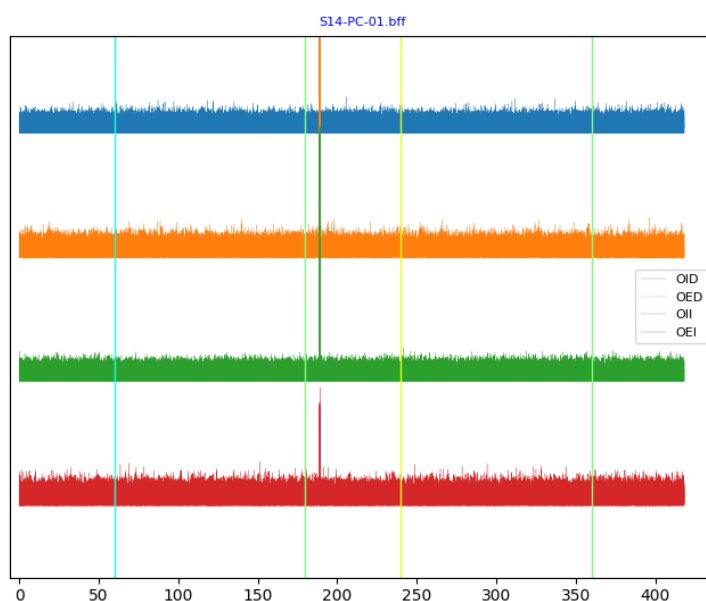

**Figure S1.** Non-STI group EMG. This figure shows the electrical activity of the 4 muscles recorded during the experiment: Blue (Right External Oblique) Orange (Left External Oblique) Green (Right Internal Oblique) and Red (Left Internal Oblique) in a subject of the non-STI group.

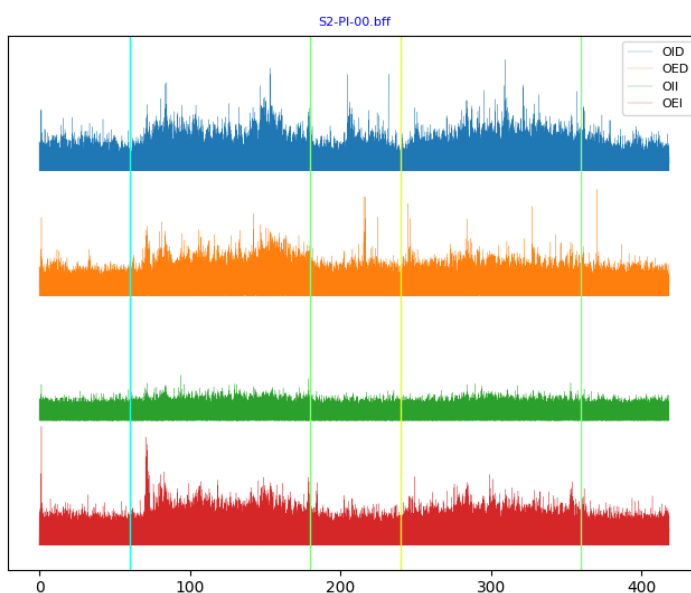

**Figure S2.** V-STI group. EMG. This figure shows the electrical activity of the 4 muscles recorded during the experiment: Blue (Right External Oblique) Orange (Left External Oblique) Green (Right Internal Oblique) and Red (Left Internal Oblique) in a subject of the V-STI group.
